# Supplementary material for: IMMUNEPOTENT CRP induces cell cycle arrest and caspase-independent regulated cell death in HeLa cells through reactive oxygen species production
Source: Springer Nature journal article supplement (doi:10.1186/s12885-017-3954-5), 2018-01-03

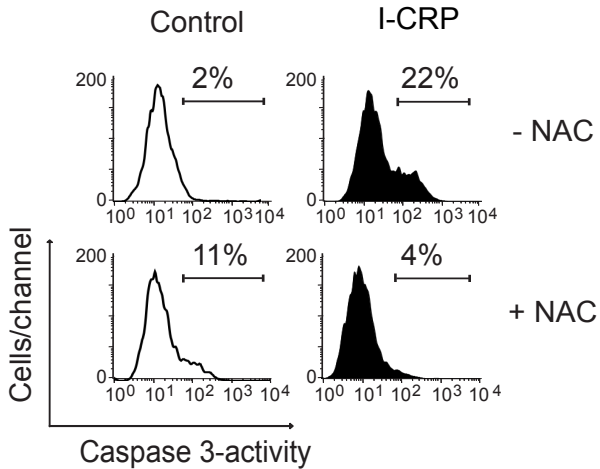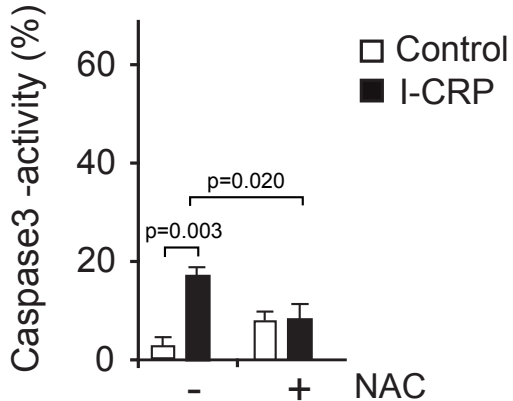

Supplement: MOESM2 [file 15342264]
